# Supplementary material for: Tissue-resident macrophages are major tumor-associated macrophage resources, contributing to early TNBC development, recurrence, and metastases
Source: PubMed Central journal article supplement (PMC9898263; doi:10.1038/s42003-023-04525-7), 2023-02-03
Supplement: 42003_2023_4525_MOESM2_ESM.pdf [file 42003_2023_4525_MOESM2_ESM.pdf]

**Tissue-resident macrophages are major tumor-associated macrophage resources, contributing to early TNBC development, recurrence, and metastases**

**Supplementary Information**

Ryuichiro Hirano, Koki Okamoto, Miyu Shinke, Marika Sato, Shigeaki Watanabe, Hitomi Watanabe, Gen Kondoh, Tetsuya Kadonosono, Shinae Kizaka-Kondoh

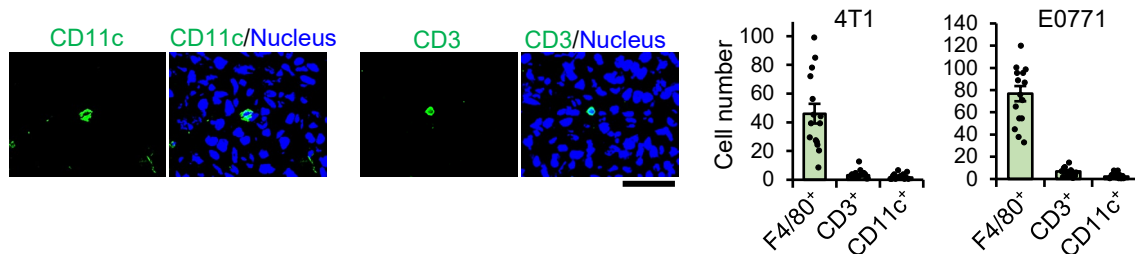

**Supplementary Fig 1. Few CD3 and CD11c positive cells in early TNBC.**

Sections of 4T1 tumors (~1 mm in diameter) in BALB/c mice 3 days after transplantation. Representative fluorescence images of CD11c<sup>+</sup> and CD3<sup>+</sup> cells (Left). Scale bar = 50  $\mu$ m. Average number of F4/80<sup>+</sup>, CD3<sup>+</sup> cells and CD11c<sup>+</sup> cells in a field (Right). n = 15. Error bars indicate standard error of the mean (s.e.m.).

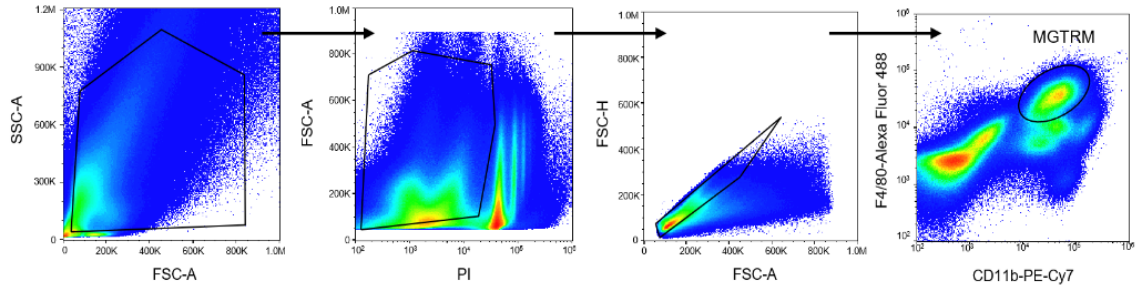

**Supplementary Fig 2. Sorting strategy for MGTRMs.**

FACS sorting strategy for isolation of MGTRMs from MGFP.

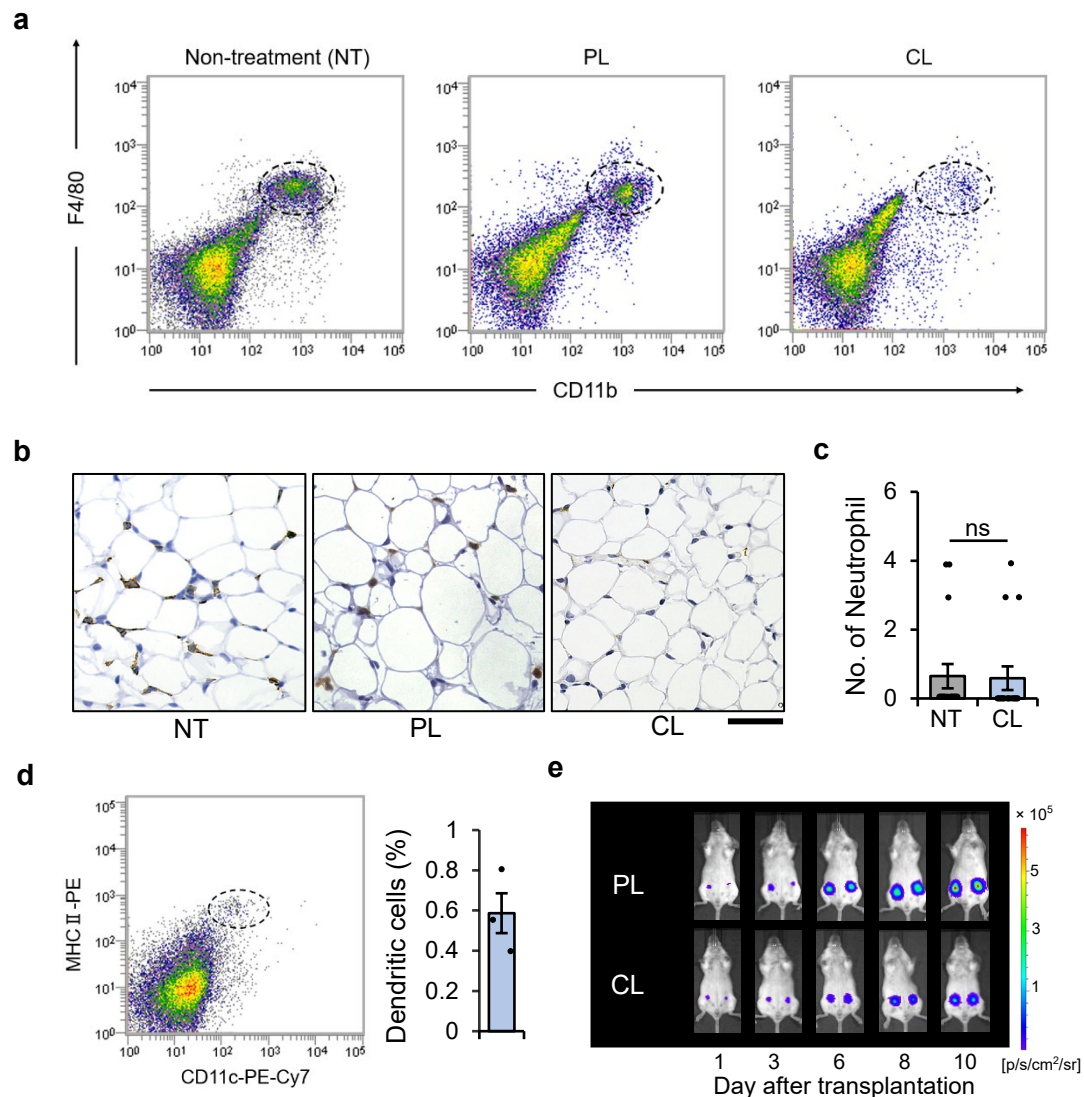

**Supplementary Fig 3. The tumor suppressive effect of CL depends on inhibition of MGTRMs.**

**a** Representative flow cytometry plot of CD11b<sup>+</sup>F4/80<sup>+</sup> MGTRMs in tumor-free BALB/c MGFP untreated and 1 days after PL or CL administration. Dot circles indicate MGTRMs.

**b** Representative immunohistochemical images of F4/80<sup>+</sup> cells in tumor-free BALB/c MGFP untreated and 1 days after PL or CL administration. Scale bar is 50  $\mu$ m.

**c** The average number in a field of Ly-6G<sup>+</sup> neutrophils in tumor-free BLAB/c MGFP untreated (NT) and 1 day after CL administration (CL). n = 17. ns, not significant (*t*-test).

**d** Representative flow cytometry plot of CD11c<sup>+</sup>MHC<sup>+</sup> dendritic cells (dot cycle) in tumor-free BALB/c MGFP (Left) and % of dendritic cells in MGFP (Right). n = 3.

**e** Representative bioluminescence images of 4T1 tumors at the indicated days after transplantation in PL- or CL-treated MGFP. **c, d** Error bars indicate s.e.m.

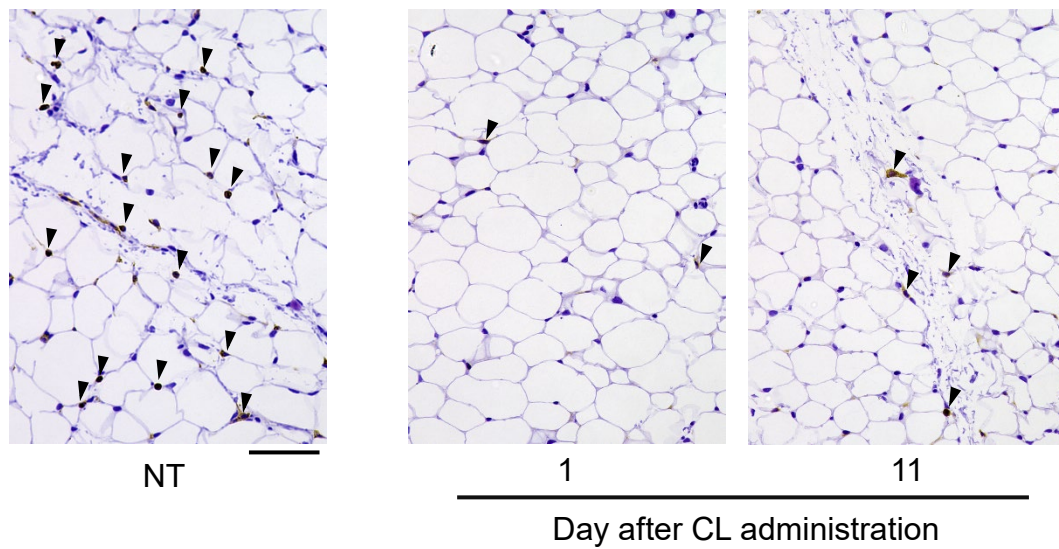

**Supplementary Figure 4. Slow recovery of MGTRMs after CL administration**

Representative images of F4/80<sup>+</sup> cells in BALB/c MGFP untreated, 1 and 11 days after CL administration. Arrow heads indicate F4/80<sup>+</sup> cells. Scale bar is 100  $\mu$ m.

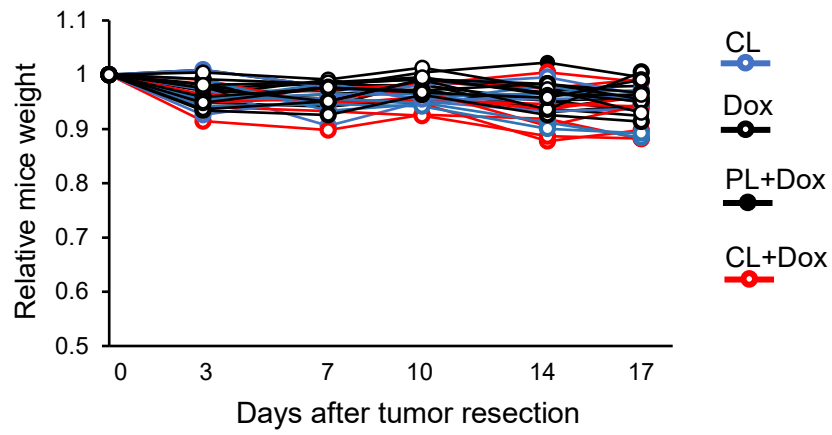

**Supplementary Fig 5. The transition of body weight of mice during treatment after surgery.**

Body weight of the mice shown in Fig. 5e on the indicated days after tumor resection.

There was no significant difference between any groups.
