# Supplementary material for: Tissue-resident macrophages are major tumor-associated macrophage resources, contributing to early TNBC development, recurrence, and metastases
Source: PubMed Central journal article supplement (PMC9898263; doi:10.1038/s42003-023-04525-7), 2023-02-03
Supplement: 42003_2023_4525_MOESM3_ESM.pdf [file 42003_2023_4525_MOESM3_ESM.pdf]

## Description of Additional Supplementary Files

**File name:** Supplementary Movie 1

**Description:** Photoacoustic imaging movie of 4T1 tumor transplanted PL-treated mammary gland

**File name:** Supplementary Movie 2

**Description:** Photoacoustic imaging movie of 4T1 tumor transplanted CL-treated mammary gland

**File name:** Supplementary Data

**Description:** The source data behind the graphs in the paper
